# Supplementary material
Source: Springer Nature journal article supplement (https://www.springermedizin.de/resource/supplementary/13063_2010_451_MOESM8_ESM.pdf/9618242)

# FLOWCHART: GUIDANCE FOR OBTAINING INFORMED CONSENT

## FULFILS ELIGIBILITY CRITERIA FOR WOMAN TRIAL?

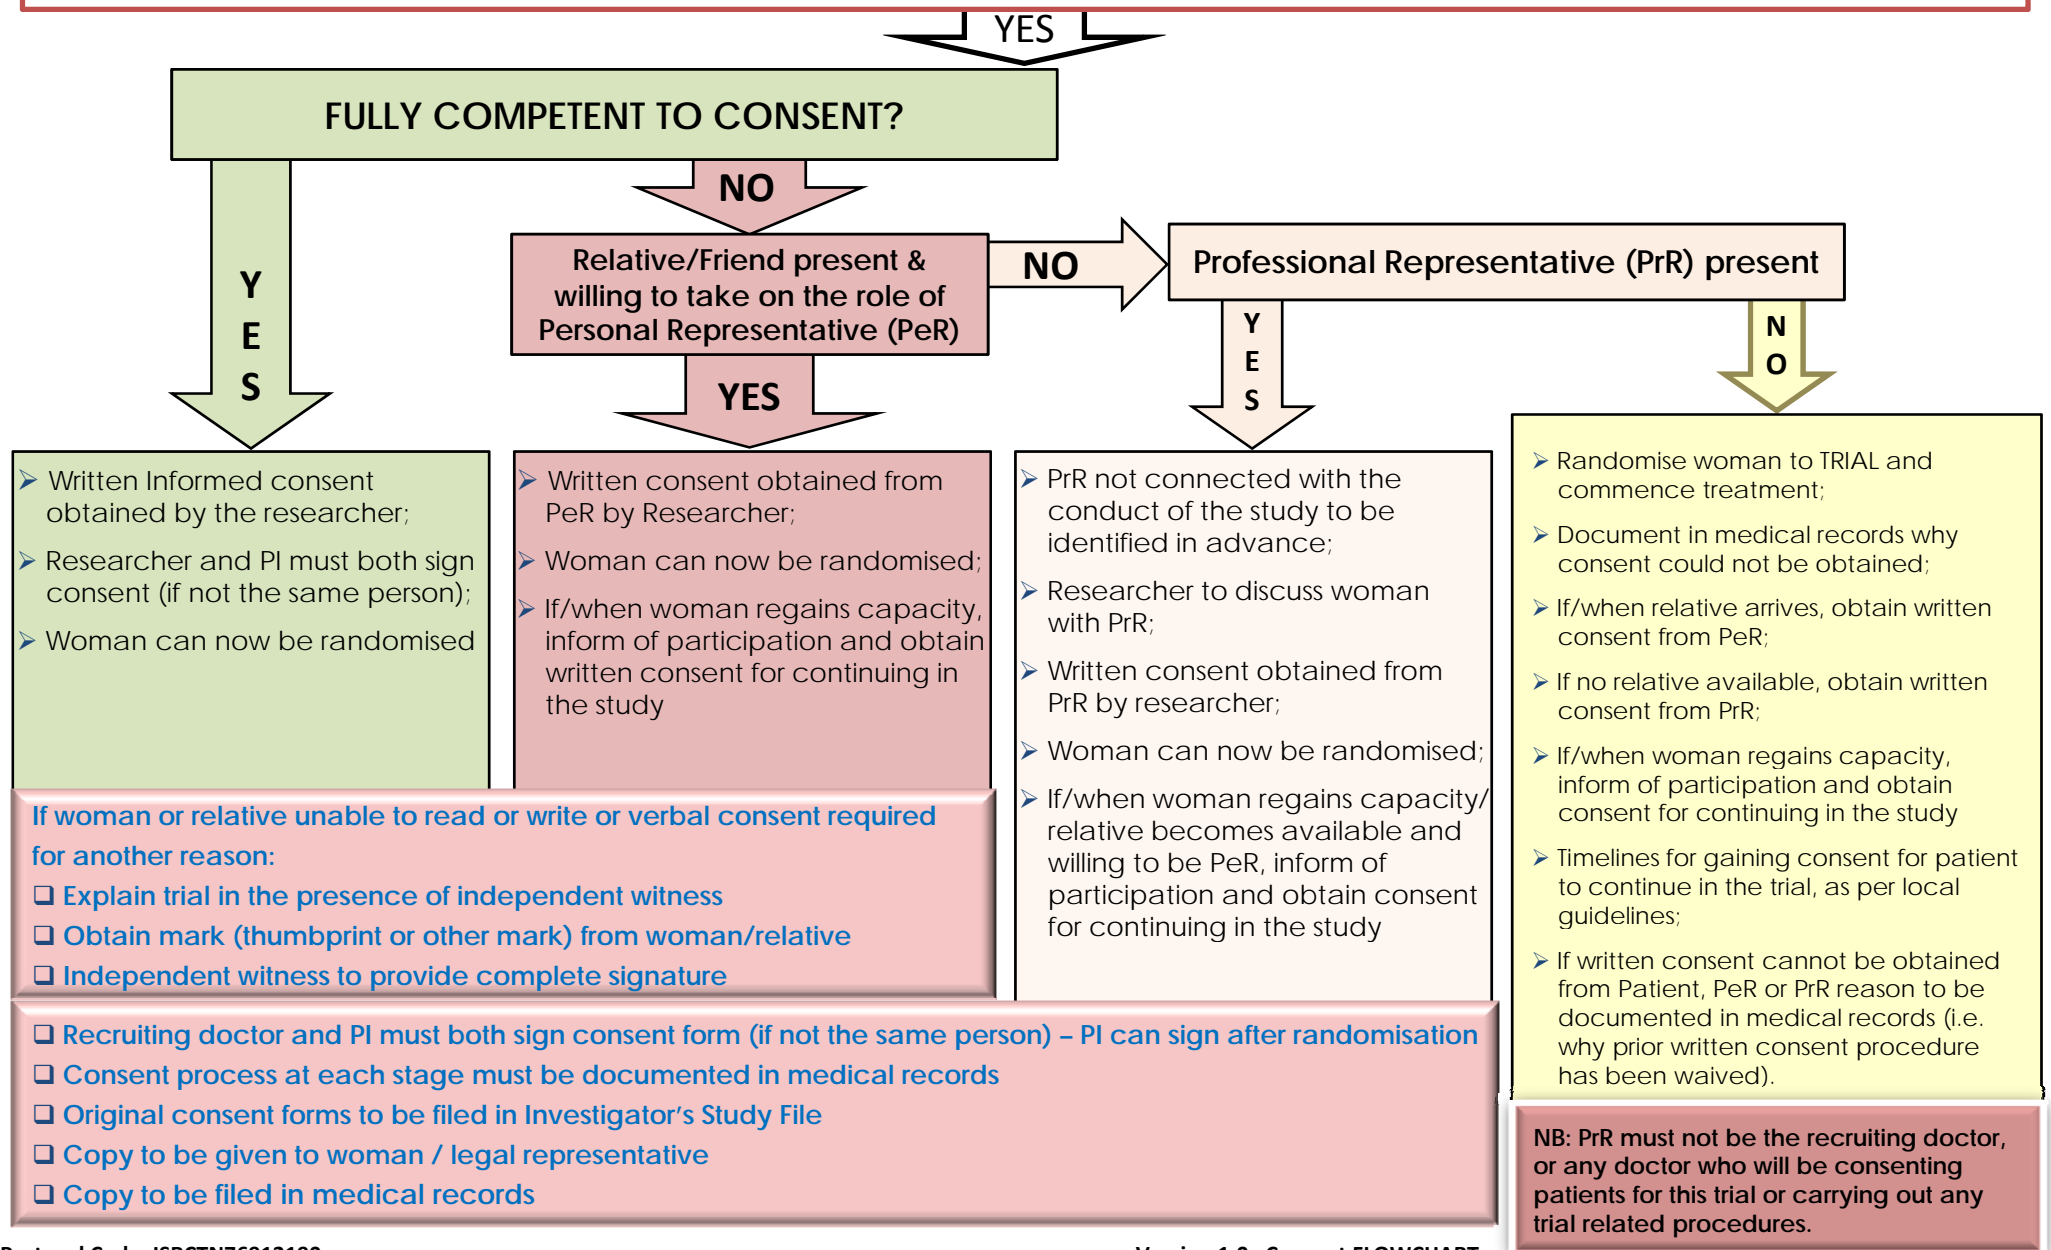

Supplement: MOESM8 [file 9618242]
